# Supplementary material for: Do Elderly Patients with Atrial Fibrillation Have Comparable Ablation Outcomes Compared to Younger Ones? Evidence from Pooled Clinical Studies
Source: MDPI journal article supplement (doi:10.3390/jcm11154468), 2022-07-31
Supplement: s1 [file s1]

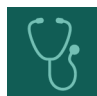

**Supplementary Table S1.** Quality assessment of eligible studies according to the Newcastle-Ottawa Quality Assessment Scale.

| First Author    | Year | Selection                                |                                    | Comparability             |                                                                          | Outcome                                                         |                       | Total Stars |                                                 |                                  |
|-----------------|------|------------------------------------------|------------------------------------|---------------------------|--------------------------------------------------------------------------|-----------------------------------------------------------------|-----------------------|-------------|-------------------------------------------------|----------------------------------|
|                 |      | Representativeness of the Exposed Cohort | Selection of the Nonexposed Cohort | Ascertainment of Exposure | Demonstration that Outcome of Interest Was Not Present at Start of Study | Comparability of Cohorts on the Basis of the Design or Analysis | Assessment of Outcome |             | Was Follow-Up Long Enough for Outcomes to Occur | Adequacy of Follow-Up of Cohorts |
| Natale [10]     | 2021 | ★                                        | ★                                  | ★                         | ★                                                                        | ★★                                                              | ★                     | ★           | ★                                               | 9                                |
| Vermeersch [6]  | 2021 | ★                                        | ★                                  | ★                         | ★                                                                        | ★★                                                              | ★                     | ★           | ★                                               | 9                                |
| Sciarra [11]    | 2021 | ★                                        | ★                                  | ★                         | ★                                                                        | ★★                                                              | ★                     | ★           | ★                                               | 9                                |
| Hartl [12]      | 2021 | ★                                        | ★                                  | ★                         | ★                                                                        | ★★                                                              | ★                     | ★           |                                                 | 8                                |
| Zhou [13]       | 2020 | ★                                        | ★                                  | ★                         | ★                                                                        | ★★                                                              | ★                     | ★           |                                                 | 8                                |
| Kanda [14]      | 2019 | ★                                        | ★                                  | ★                         | ★                                                                        | ★★                                                              | ★                     | ★           | ★                                               | 9                                |
| Fink [15]       | 2019 | ★                                        | ★                                  | ★                         | ★                                                                        | ★★                                                              | ★                     | ★           | ★                                               | 9                                |
| Zhang-1[16]     | 2019 | ★                                        | ★                                  | ★                         | ★                                                                        | ★★                                                              | ★                     |             | ★                                               | 8                                |
| Heeger [17]     | 2019 | ★                                        | ★                                  | ★                         | ★                                                                        | ★★                                                              | ★                     | ★           |                                                 | 8                                |
| Romero [18]     | 2019 | ★                                        | ★                                  | ★                         | ★                                                                        | ★★                                                              | ★                     | ★           |                                                 | 8                                |
| Abdin [19]      | 2019 | ★                                        | ★                                  | ★                         | ★                                                                        | ★★                                                              | ★                     | ★           | ★                                               | 9                                |
| Zhang-2 [20]    | 2019 | ★                                        | ★                                  | ★                         | ★                                                                        | ★★                                                              | ★                     | ★           |                                                 | 8                                |
| Tscholl [21]    | 2018 | ★                                        | ★                                  | ★                         | ★                                                                        | ★★                                                              | ★                     | ★           |                                                 | 8                                |
| Moser [22]      | 2017 | ★                                        | ★                                  | ★                         | ★                                                                        | ★★                                                              | ★                     | ★           | ★                                               | 9                                |
| Abugattas [23]  | 2017 | ★                                        | ★                                  | ★                         | ★                                                                        | ★★                                                              | ★                     | ★           | ★                                               | 9                                |
| Kautzner [24]   | 2017 | ★                                        | ★                                  | ★                         | ★                                                                        | ★★                                                              | ★                     | ★           | ★                                               | 9                                |
| Bunch-2 [25]    | 2016 | ★                                        | ★                                  | ★                         | ★                                                                        | ★★                                                              | ★                     | ★           | ★                                               | 9                                |
| Lioni [26]      | 2014 | ★                                        | ★                                  | ★                         | ★                                                                        | ★★                                                              | ★                     | ★           | ★                                               | 9                                |
| Santangeli [27] | 2012 | ★                                        | ★                                  | ★                         | ★                                                                        | ★★                                                              | ★                     | ★           | ★                                               | 9                                |
| Hao [28]        | 2012 | ★                                        | ★                                  | ★                         | ★                                                                        | ★★                                                              | ★                     |             | ★                                               | 8                                |
| Bunch-1 [29]    | 2010 | ★                                        | ★                                  | ★                         | ★                                                                        | ★★                                                              | ★                     | ★           | ★                                               | 9                                |
| Kusumoto [30]   | 2009 | ★                                        | ★                                  | ★                         | ★                                                                        | ★★                                                              | ★                     | ★           | ★                                               | 9                                |
| Bhargava [31]   | 2004 | ★                                        | ★                                  | ★                         | ★                                                                        | ★★                                                              | ★                     | ★           | ★                                               | 9                                |

Note: ★ represents a star, and ★★ represents two stars

**Supplementary Table S2.** Quality assessment of the single-arm studies according to the Institute of Health Economics checklist.

| First author | Year | Study Objective | Study Design | Study Population | Intervention and Cointervention | Outcome Measures | Statistical Analysis | Results and Conclusions | Quality Score |
|--------------|------|-----------------|--------------|------------------|---------------------------------|------------------|----------------------|-------------------------|---------------|
| Liu [32]     | 2022 | 1               | 3            | 3                | 2                               | 3                | 1                    | 5                       | 18            |
| Akhtar [33]  | 2020 | 1               | 1            | 3                | 2                               | 3                | 1                    | 5                       | 16            |
| Metzner [34] | 2016 | 1               | 2            | 3                | 2                               | 3                | 1                    | 4                       | 16            |
| Corrado [35] | 2008 | 1               | 2            | 3                | 2                               | 3                | 1                    | 4                       | 16            |

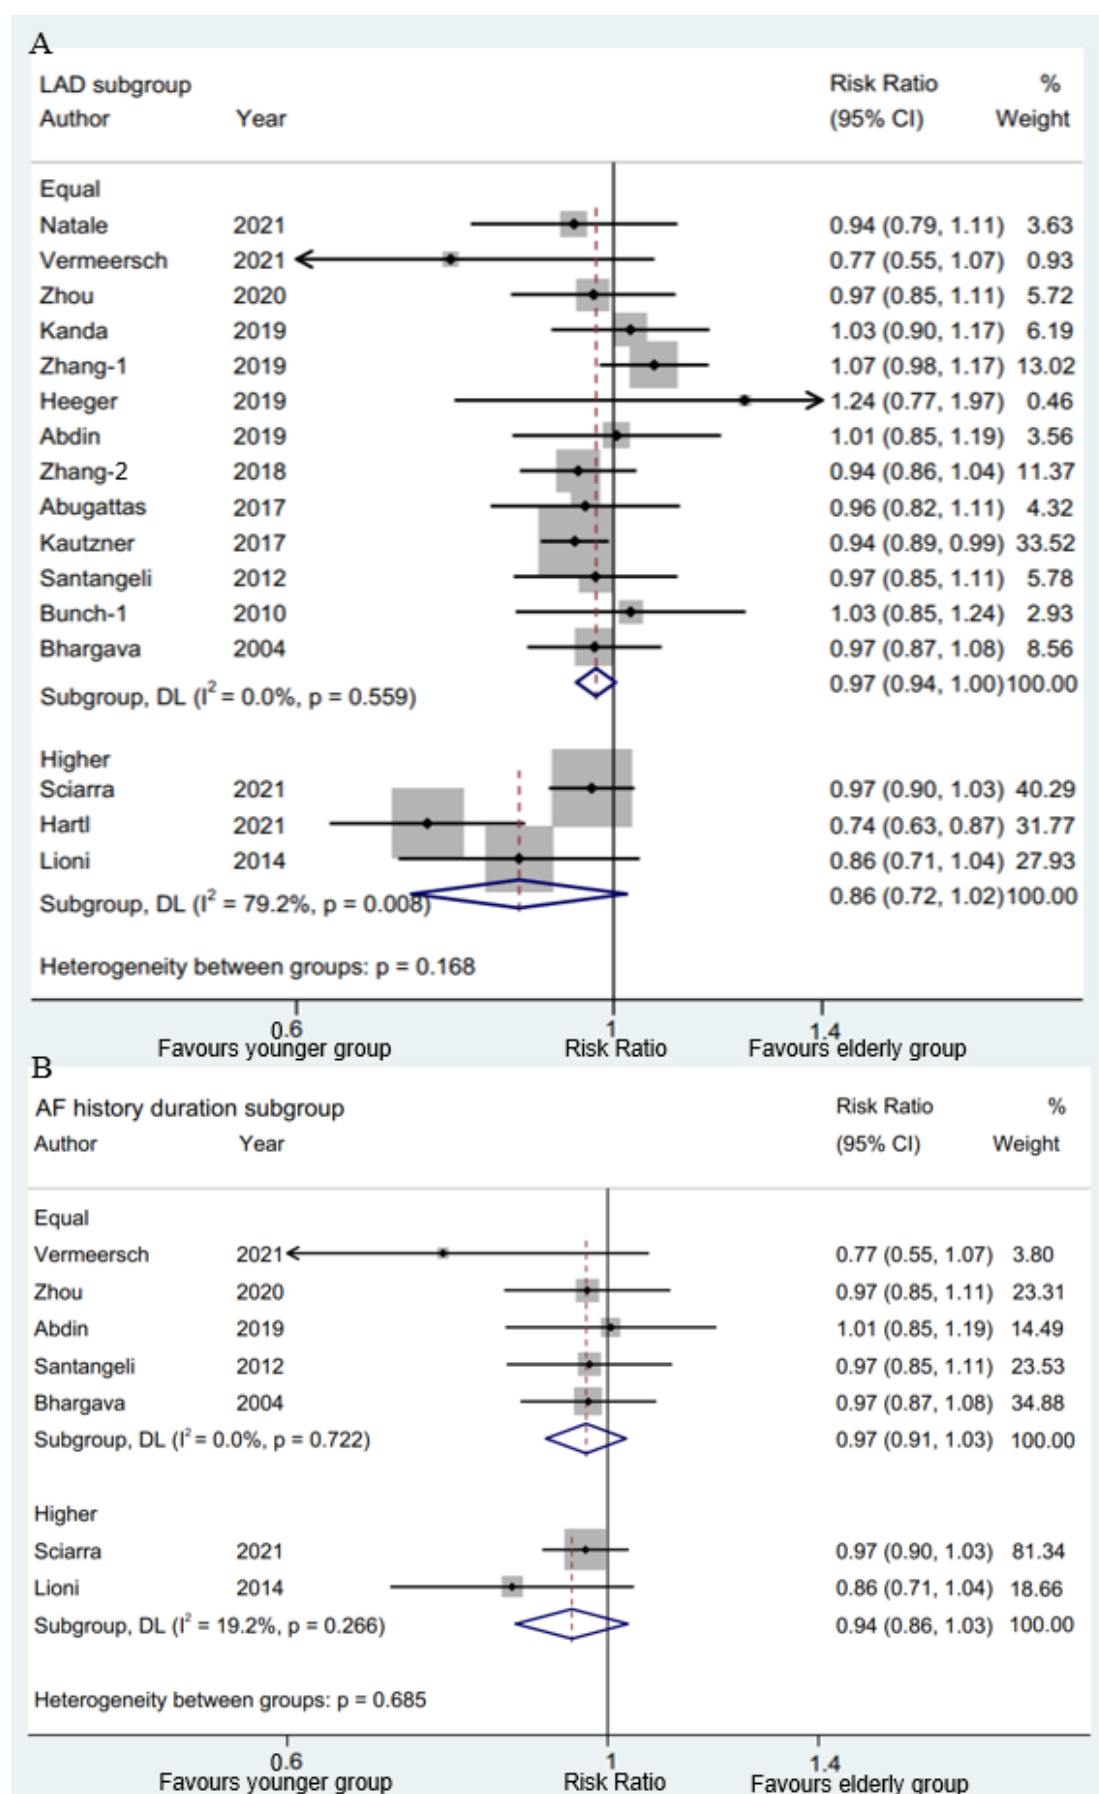

**Supplementary Figure S1.** Forest plot of subgroup analysis of the rates of freedom from AF between elderly and younger groups in terms of LAD and AF history duration. (A) Subgroup analysis of the rates of freedom from AF between elderly and younger groups in terms of LAD showed no significant difference between the equal and higher subgroups ( $p = 0.168$ ) [6,10-14,16,17,19,20,23,24,26,27,29,31]; (B) subgroup analysis of the rates of freedom from AF between elderly and younger groups in terms of AF history duration showed no significant difference between the equal and higher subgroups ( $p = 0.685$ ) [6,11,13,19,26,27,31]. LAD: left atrial diameter; AF: atrial fibrillation.

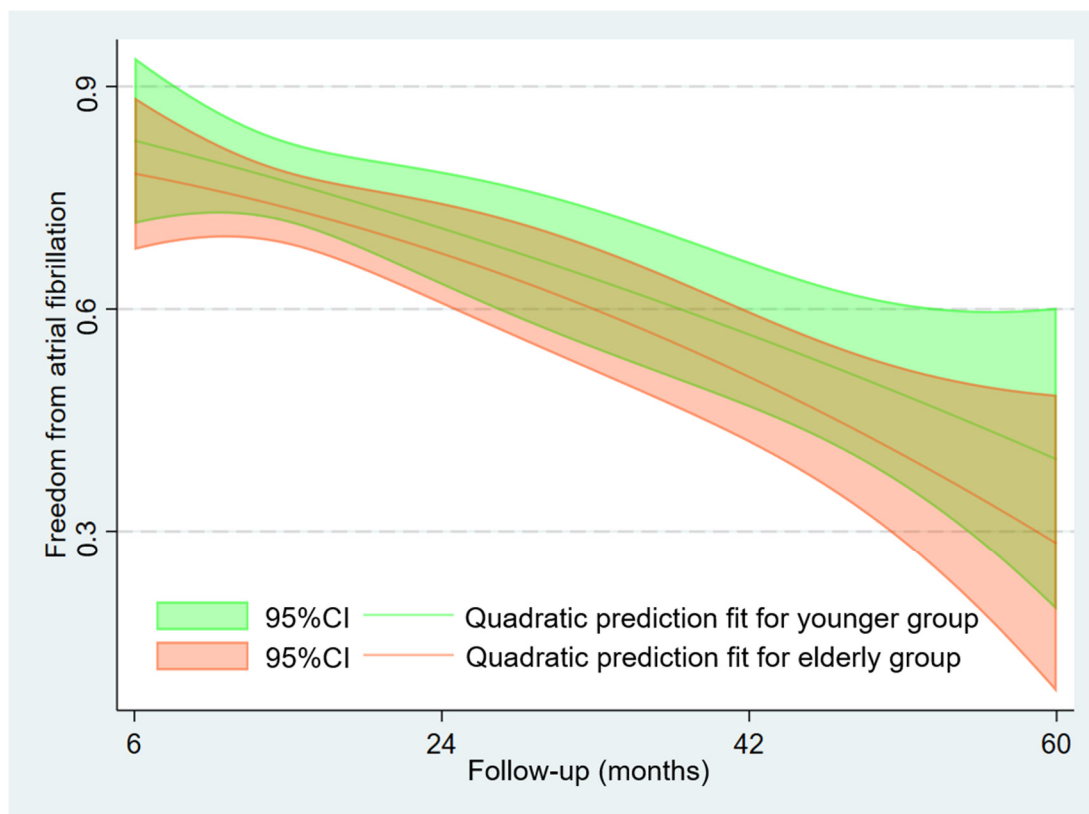

**Supplementary Figure S2.** Quadratic prediction fit plot with confidence intervals between the follow-up time and the rates of freedom from AF for the elderly group and the younger group. Overlapping the quadratic prediction fit plot with the confidence interval for elderly and younger groups to visualize the difference in rates of freedom from AF between the two groups. AF: atrial fibrillation; CI: confidence interval.

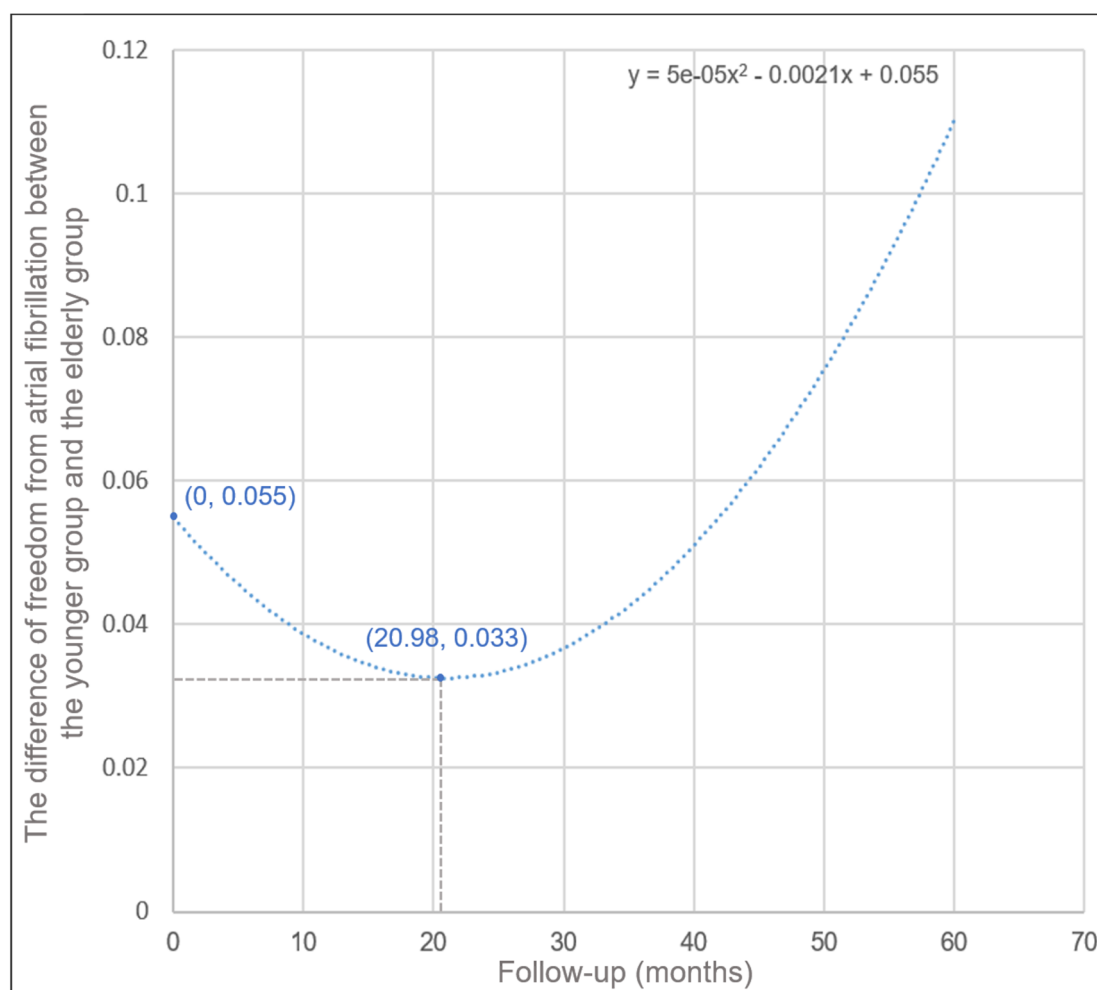

**Supplementary Figure S3.** The relationship of the follow-up time and the difference of freedom from AF between the younger group and the elderly group. The difference monotonically decreased in the interval of 0 to 20.98 months, while the difference monotonically increased in the interval of  $\geq 20.98$  months. AF: atrial fibrillation.

**Supplementary Table S3.** Pooled incidence of safety outcomes in the elderly group.

| Safety Outcomes                  | Numbers of Study | Pooled Incidence | 95% CI    | I <sup>2</sup> (%) | p Value |
|----------------------------------|------------------|------------------|-----------|--------------------|---------|
| Cerebrovascular events           | 24               | 0.00             | 0.00–0.01 | 30.40              | 0.000   |
| Serious hemorrhage complications | 22               | 0.00             | 0.00–0.01 | 15.98              | 0.000   |
| Phrenic nerve injury             | 14               | 0.01             | 0.00–0.02 | 77.25              | 0.011   |
| All-cause death                  | 16               | 0.01             | 0.00–0.02 | 83.82              | 0.050   |

Notes: Cerebrovascular events include stroke or transient ischemic attack (TIA); serious hemorrhage complications include hemothorax, perforation, tamponade, or major bleeding.
